# Supplementary material
Source: ML conference proceedings conference paper supplement (https://openreview.net/forum?id=z5vZDI2r6J)
Supplement: supplementary_material [file README.pdf › supple/README.pdf]

# Supplementary material Nips Submission 8897

---

## Directory

---

### Supplementary material

- |----360\_NIAT\_tables.json
- |----NIAT\_data
  - |----NIAT\_LLM\_test\_data
  - |----JSON data
- |----NIAT\_MLLM\_test\_data
  - |----table\_images
  - |----JSON data
- |----README.pdf
- |----supplementary\_material.pdf
